# Supplementary material
Source: PubMed Central journal article supplement (PMC3631587)
Supplement: NIHMS404352-supplement-01.pdf [file NIHMS404352-supplement-01.pdf]

**Supplemental Table 1: Weekly Steroid Dose at the Time of Study Enrollment**

| <b>UPN</b> | <b>Weekly Prednisone dose (mg)</b> |
|------------|------------------------------------|
| 4776       | 20                                 |
| 4802       | 105                                |
| 4867       | 40                                 |
| 5230       | 160                                |
| 5038       | 120                                |
| 4726       | 120                                |
| 5270       | 1245                               |
| 5062       | 120                                |
| 5055       | 60                                 |
| 4784       | 60                                 |
| 4822       | 80                                 |
| 5285       | 80                                 |
| 0002       | 385                                |
| 5362       | 70                                 |
| 4659       | 120                                |
| 4489       | 160                                |
| 5229       | 20                                 |
| 3819       | 40                                 |
| 5376       | 385                                |
| 5393       | 840                                |
| 5394       | 350                                |
| 5412       | 245                                |
